# Supplementary material for: Biological evaluation of non-steroidal anti-inflammatory drugs-cobalt(ii) complexes
Source: Royal Society of Chemistry journal article supplement (doi:10.1039/b927472c), 2010-01-01

## **Biological evaluation of non-steroidal anti-inflammatory drugs-cobalt(II) complexes**

**Filitsa Dimiza<sup>1</sup>, Athanasios N. Papadopoulos<sup>2</sup>, Vassilis Tangoulis<sup>1</sup>, Vassilis Psycharis<sup>3</sup>,  
Catherine P. Raptopoulou<sup>3</sup>, Dimitris P. Kessissoglou<sup>1</sup>, George Psomas<sup>1,\*</sup>**

<sup>1</sup> *Department of General and Inorganic Chemistry, Faculty of Chemistry, Aristotle University of Thessaloniki, P.O. Box 135, GR-54124 Thessaloniki, GREECE*

<sup>2</sup> *Department of Nutrition and Dietetics, Faculty of Food Technology and Nutrition, Alexandrion Technological Educational Institution, Sindos, Thessaloniki, GREECE.*

<sup>3</sup> *Institute of Materials Science, NCSR "Demokritos", GR-15310 Aghia Paraskevi Attikis, GREECE*

### **Supplementary material**

---

\* Corresponding author: Dr. George Psomas, Tel.:+30+2310997790; Fax:+30+2310997738; E-mail: gepsomas@chem.auth.gr

**Figure S1.** X-Band EPR spectra of (A) **1** and (B) **2** in powder samples (up) and in frozen dmsol solution (down) at 4K.

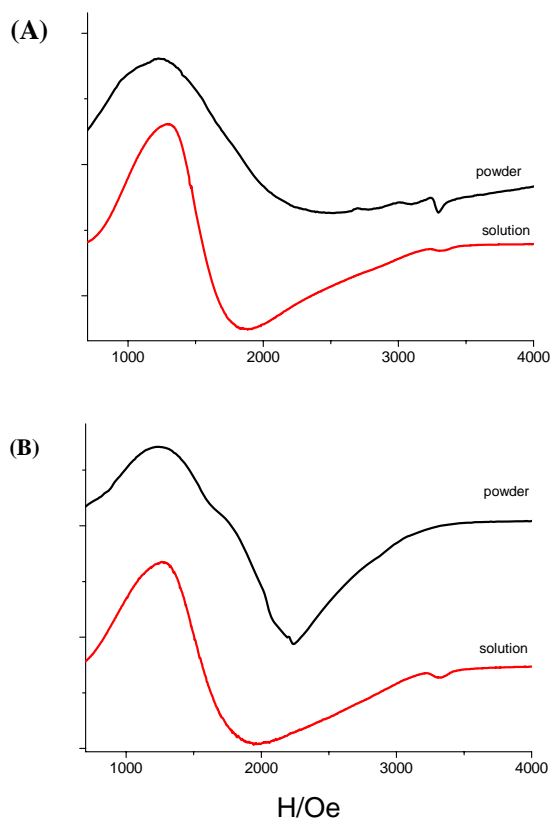

**Figure S2.** Stern-Volmer quenching plot of EB bound to CT DNA for Hmef and complexes **1-4**.

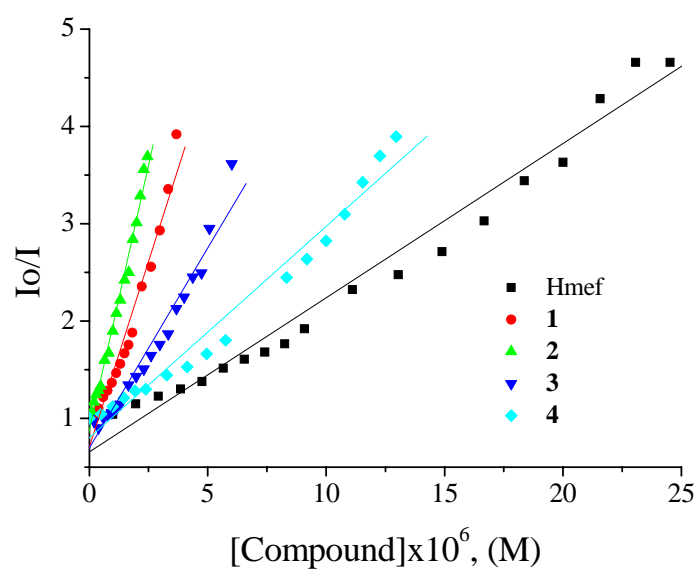

**Figure S3.** Stern-Volmer quenching plot of BSA for Hmef and complexes **1-4**.

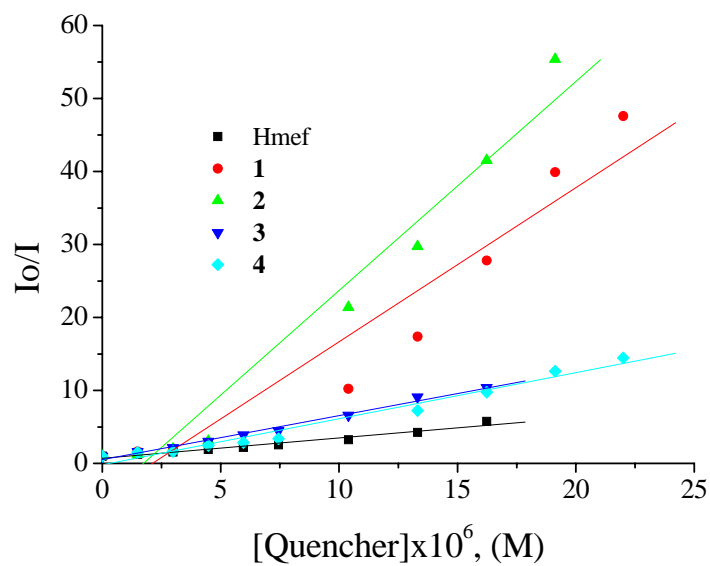

**Figure S4.** Scatchard plot of BSA for Hmef and complexes **1-4**.

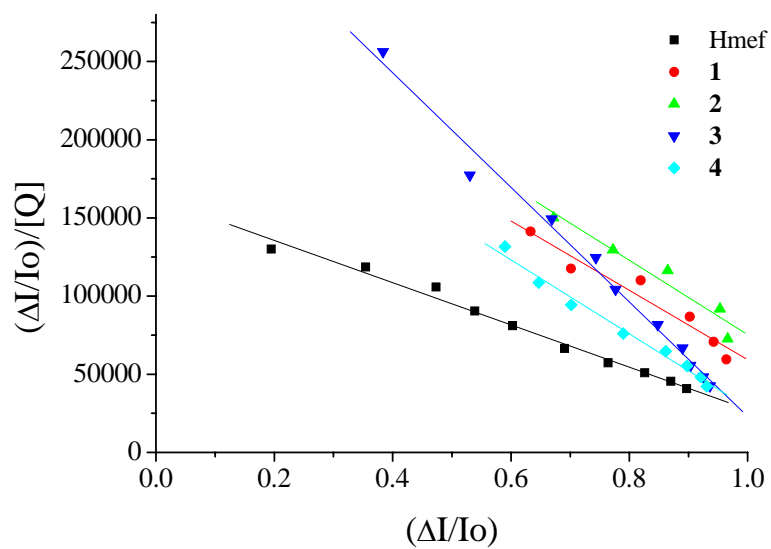

**Figure S5.** Stern-Volmer quenching plot of HSA for Hmef and complexes **1-4**.

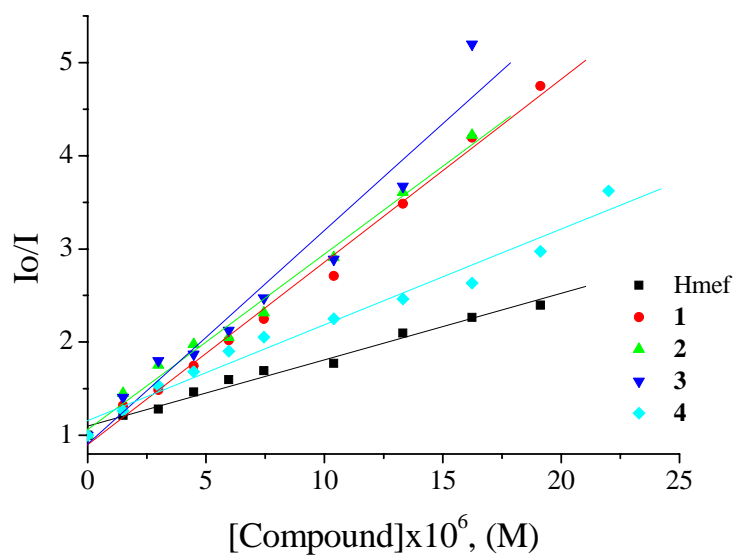

**Figure S6.** Scatchard plot of HSA for Hmef and complexes **1-4**.

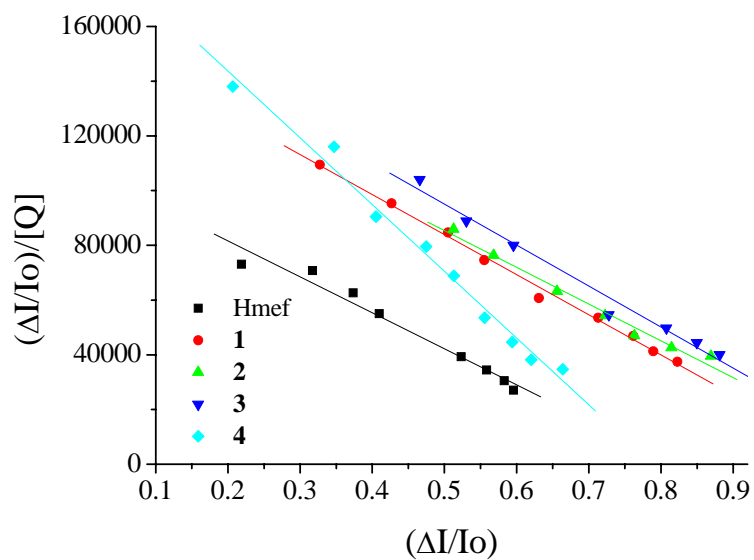

Supplement: b927472c.pdf [file b927472c.pdf]
